# Supplementary material for: Probabilistic electrical stimulation mapping of human medial frontal cortex
Source: PubMed Central journal article supplement (PMC6259584; doi:10.1016/j.cortex.2018.06.015), 2018-12
Supplement: mmc1.pdf [file mmc1.pdf]

Supplementary Table 1: Patient clinical characteristics

| Patient | Type       | Sex | Handed | Age at onset | Age at ICR | Epilepsy duration | Side  | Language dominance | Imaging abnormality              | Ictal onset zone               | Pathology, if operated | ILAE outcome (months) |
|---------|------------|-----|--------|--------------|------------|-------------------|-------|--------------------|----------------------------------|--------------------------------|------------------------|-----------------------|
| 1       | Grid       | F   | Left   | 3            | 27         | 24                | Left  | Left               | None                             | Left SFG                       | FCD iia                | 1 (39)                |
| 2       | Grid       | F   | Right  | 12           | 36         | 24                | Left  | Left               | None                             | Left mesial SFG                | Non-specific           | 5 (54)                |
| 3       | Grid       | M   | Right  | 6            | 26         | 20                | Right | Bilateral          | None                             | Right SFG/precentral           | FCD iia                | 4 (33)                |
| 4       | Grid       | F   | Right  | 10           | 28         | 18                | Right | Left               | None                             | Right SFG                      | FCD iib                | 1 (54)                |
| 5       | Grid       | F   | Right  | 8            | 23         | 15                | Left  | Left               | Left insula lesion               | Left anterior frontal          | Gliosis                | 5 (27)                |
| 6       | Grid       | M   | Right  | 12           | 20         | 8                 | Left  | Left               | None                             | Left pre/post central/SMA      | Inoperable             | N/a                   |
| 7       | Grid+depth | M   | Right  | 16           | 45         | 29                | Left  | Left               | None                             | Not localised                  | Inoperable             | N/a                   |
| 8       | Grid+depth | M   | Right  | 27           | 40         | 13                | Right | Left               | None                             | Right SFG                      | FCD iib                | 1 (60)                |
| 9       | Grid+depth | M   | Right  | 2            | 21         | 19                | Right | Left               | Dysplastic left precentral gyrus | Primary motor area             | Inoperable             | N/a                   |
| 10      | Grid+depth | M   | Right  | 38           | 48         | 10                | Left  | Left               | None                             | Left SMA                       | Inoperable             | N/a                   |
| 11      | Grid+depth | M   | Right  | 10           | 23         | 13                | Right | N/a                | None                             | Not localised                  | Inoperable             | N/a                   |
| 12      | Grid+depth | M   | Right  | 6            | 25         | 19                | Left  | Left               | Left central gyrus signal change | Right hand sensory motor area  | Inoperable             | N/a                   |
| 13      | Grid+depth | F   | Right  | 11           | 21         | 10                | Left  | Left               | Cerebellar lesion                | Left primary motor cortex      | Inoperable             | N/a                   |
| 14      | Grid+depth | M   | Right  | 8            | 18         | 10                | Left  | Left               | Left precentral gyrus tumour     | Left paracentral/precentral    | Inoperable             | N/a                   |
| 15      | Grid+depth | M   | Right  | 6            | 38         | 32                | Right | Left               | Dysplastic right SFG             | Right SMA                      | Gliosis                | 5 (42)                |
| 16      | Grid+depth | M   | Right  | 29           | 41         | 12                | Left  | Left               | None                             | Left SMA                       | Non-specific           | 5 (12)                |
| 17      | Grid+depth | F   | Right  | 5            | 49         | 44                | Left  | Left               | Dysplastic left IFG              | Left IFG                       | Inoperable             | N/a                   |
| 18      | Grid+depth | M   | Right  | 12           | 32         | 20                | Right | Bilateral          | Right parietal dysplasia         | Right SPL                      | FCD iib                | 1 (54)                |
| 19      | Grid+depth | M   | Right  | 14           | 49         | 35                | Left  | Left               | Resected left MFG                | Left SFG and MFG               | DNET                   | 3 (19)                |
| 20      | Depth      | M   | Right  | 13           | 30         | 17                | Left  | Left               | Non lesional                     | Left anterior medial frontal   | Non-specific           | 5 (12)                |
| 21      | Depth      | M   | Right  | 15           | 29         | 14                | Left  | Left               | Non lesional                     | Left insula                    | Inoperable             | N/a                   |
| 22      | Depth      | M   | Right  | 25           | 46         | 21                | Right | Bilateral          | Non lesional                     | Right orbito-/inferior frontal | Inoperable             | N/a                   |
| 23      | Depth      | M   | Right  | 12           | 30         | 18                | Right | Bilateral          | Non lesional                     | Right mesiofrontal             | Awaiting               | N/a                   |
| 24      | Depth      | M   | Right  | 10           | 33         | 23                | Right | Left               | Non lesional                     | Right insular                  | Awaiting               | N/a                   |
| 25      | Depth      | F   | Right  | 13           | 46         | 33                | Left  | Left               | Left frontal dysplasia           | Left middle frontal gyrus      | Awaiting               | N/a                   |
| 26      | Depth      | M   | Right  | 7            | 32         | 25                | Left  | Bilateral          | Left HS                          | Left temporal                  | Awaiting               | N/a                   |
| 27      | Depth      | M   | Equal  | 1            | 37         | 36                | Left  | Left               | Left HS                          | Left hippocampus               | HS                     | 1 (4)                 |
| 28      | Depth      | M   | Right  | 23           | 27         | 4                 | Right | Left               | None                             | Right SFG and MFG              | Awaiting               | N/a                   |
| 29      | Depth      | M   | Right  | 5            | 19         | 14                | Right | Unclear            | None                             | Right SFG                      | FCD iib                | 3 (13)                |
| 30      | Depth      | M   | Right  | 1            | 26         | 25                | Both  | Left               | None                             | Right SFG and MFG              | Inoperable             | N/a                   |
| 31      | Depth      | F   | Right  | 6            | 22         | 16                | Left  | N/a                | None                             | Left anterior insula           | Inoperable             | N/a                   |
| 32      | Depth      | M   | Right  | 7            | 41         | 34                | Left  | Left               | None                             | Left insula                    | Inoperable             | N/a                   |
| 33      | Depth      | M   | Equal  | 3            | 44         | 41                | Left  | Right              | Left frontal dysplasia           | Left frontopolar/orbital       | Awaiting               | N/a                   |
| 34      | Depth      | M   | Right  | 11           | 41         | 30                | Right | Left               | Lesion SFG                       | Right SFG                      | Inoperable             | 4 (15)                |
| 35      | Depth      | F   | Right  | 3            | 34         | 31                | Left  | Left               | Left frontal dysplasia           | Frontal lobe                   | Inoperable             | N/a                   |
| 36      | Depth      | M   | Right  | 16           | 32         | 16                | Right | Left               | None                             | Right orbitofrontal            | Gliosis                | 1 (36)                |
| 37      | Depth      | M   | Right  | 38           | 8          | 30                | Right | Left               | None                             | Right SMA                      | Non-specific           | 1 (60)                |
| 38      | Depth      | M   | Left   | 6            | 46         | 40                | Right | Left               | None                             | Right orbitofrontal            | Normal                 | 1 (6)                 |

Abbreviations: **F** female, **M** male, **ICR** intracranial recording, **FCD** focal cortical dysplasia, **SMA** supplementary motor area, **HS** hippocampal sclerosis, **DNET** dysembryoplastic neuroepithelial tumour.
